# Supplementary material for: Halogen-bonded cocrystals via resonant acoustic mixing
Source: Royal Society of Chemistry journal article supplement (doi:10.1039/d3mr00028a), 2024-01-01
Supplement: d3mr00028a1.pdf [file d3mr00028a1.pdf]

**ELECTRONIC SUPPLEMENTARY INFORMATION for:**

**Halogen-Bonded Cocrystals via Resonant Acoustic Mixing**

Alireza Nari, Jeffrey S. Ovens, and David L. Bryce\*

Department of Chemistry and Biomolecular Sciences, Centre for Catalysis Research and  
Innovation, and Nexus for Quantum Technologies

University of Ottawa

Ottawa, Ontario, Canada K1N6N5

\* Author to whom correspondence may be addressed

[dbryce@uottawa.ca](mailto:dbryce@uottawa.ca)

phone 613-562-5800

fax 613-562-5170

## Table of Contents

|                                              |            |
|----------------------------------------------|------------|
| <b>1: 1<i>a</i>(i), (p-DITFB)·2(TMP):</b>    | <b>S6</b>  |
| 1-1: RAM mechanochemistry synthesis          | S6         |
| 1-2: Ball milling preparation                | S6         |
| 1-3: PXRD results                            | S6         |
| 1-3: <sup>13</sup> C CP/MAS SSNMR results    | S7         |
| <b>2: 1<i>a</i>(ii), 4(p-DITFB)·1.5(TMP)</b> | <b>S7</b>  |
| 2.1: RAM mechanochemistry synthesis          | S7         |
| 2.2: PXRD results                            | S7         |
| 2.3: <sup>13</sup> C CP/MAS SSNMR results    | S8         |
| <b>3: 2<i>a</i>, (sym-TFTIB)·(TMP)</b>       | <b>S8</b>  |
| 3.1: RAM mechanochemistry synthesis          | S8         |
| 3.2: Ball milling preparation                | S8         |
| 3.3: PXRD results                            | S9         |
| 3.4: <sup>13</sup> C CP/MAS SSNMR results    | S9         |
| <b>4: 1<i>b</i>, (p-DITFB)·2(DMAP)</b>       | <b>S10</b> |
| 4.1: RAM mechanochemistry synthesis          | S10        |
| 4.2: Ball milling preparation                | S10        |
| 4.3: PXRD results                            | S10        |
| 4.4: <sup>13</sup> C CP/MAS SSNMR results    | S11        |
| <b>5: 2<i>b</i>, (sym-TFTIB)·3(DMAP)</b>     | <b>S11</b> |
| 5.1: RAM mechanochemistry synthesis          | S11        |
| 5.2: Ball milling preparation                | S11        |
| 5.3: PXRD results                            | S12        |
| 5.4: <sup>13</sup> C CP/MAS SSNMR results    | S12        |
| <b>6: 1<i>c</i>, 2(p-DITFB)·(o-Phe)</b>      | <b>S13</b> |
| 6.1: RAM mechanochemistry synthesis          | S13        |
| 6.2: Ball milling preparation                | S13        |
| 6.3: PXRD results                            | S13        |
| 6.4: <sup>13</sup> C CP/MAS SSNMR results    | S14        |
| <b>7: 2<i>c</i>, (sym-TFTIB)·(o-Phe)</b>     | <b>S14</b> |

|                                                                                                                         |            |
|-------------------------------------------------------------------------------------------------------------------------|------------|
| 7.1: RAM mechanochemistry synthesis .....                                                                               | S14        |
| 7.2: Ball milling preparation .....                                                                                     | S14        |
| 7.3: PXRD results .....                                                                                                 | S15        |
| 7.4: $^{13}\text{C}$ CP/MAS SSNMR results .....                                                                         | S15        |
| <b>8: 1d, (<i>p</i>-DITFB)·(<i>PheDON</i>) .....</b>                                                                    | <b>S16</b> |
| 8.1: RAM mechanochemistry synthesis .....                                                                               | S16        |
| 8.2: Ball milling preparation .....                                                                                     | S16        |
| 8.3: PXRD results .....                                                                                                 | S16        |
| 8.4: $^{13}\text{C}$ CP/MAS SSNMR results .....                                                                         | S17        |
| <b>9: 2d, (<i>sym</i>-TFTIB)·(<i>PheDON</i>).....</b>                                                                   | <b>S17</b> |
| 9.1: RAM mechanochemistry synthesis .....                                                                               | S17        |
| 9.2: Ball milling preparation .....                                                                                     | S17        |
| 9.3: Crystal preparation by slow evaporation.....                                                                       | S17        |
| 9.4: PXRD results .....                                                                                                 | S18        |
| 9.5: $^{13}\text{C}$ CP/MAS SSNMR results .....                                                                         | S18        |
| <b>10: 1e, (<i>p</i>-DITFB)·(<i>DIZFON</i>) .....</b>                                                                   | <b>S19</b> |
| 10.1: RAM mechanochemistry synthesis: .....                                                                             | S19        |
| 10.2: Ball milling preparation .....                                                                                    | S19        |
| 10.3: PXRD results .....                                                                                                | S19        |
| 10.4: $^{13}\text{C}$ CP/MAS SSNMR results .....                                                                        | S20        |
| <b>11: 2e, (<i>sym</i>-TFTIB)·(<i>DIZFON</i>) .....</b>                                                                 | <b>S20</b> |
| 11.1: RAM mechanochemistry synthesis .....                                                                              | S20        |
| 11.2: Ball milling preparation .....                                                                                    | S20        |
| 11.3: Crystal preparation by slow evaporation.....                                                                      | S20        |
| 11.4: PXRD results .....                                                                                                | S21        |
| 11.5: $^{13}\text{C}$ CP/MAS SSNMR results .....                                                                        | S21        |
| <b>Table S1. <math>^{13}\text{C}</math>[<math>^1\text{H}</math>] CPMAS solid-state NMR experimental conditions.....</b> | <b>S22</b> |
| <b>Additional Details on Single-Crystal X-Ray Diffraction for 2d and 2e .....</b>                                       | <b>S23</b> |
| <b>References.....</b>                                                                                                  | <b>S24</b> |

## Table of Figures

|                                                                                                                                                                                                                                                                                                                                                    |     |
|----------------------------------------------------------------------------------------------------------------------------------------------------------------------------------------------------------------------------------------------------------------------------------------------------------------------------------------------------|-----|
| <b>Figure S1.</b> Experimental diffractograms for ball milled and RAM products, and calculated diffractogram for cocrystal <b>1a(i)</b> , (p-DITFB)·2(TMP). .....                                                                                                                                                                                  | S6  |
| <b>Figure S2.</b> <sup>13</sup> C solid-state NMR spectra of cocrystal <b>1a(i)</b> , (p-DITFB)·2(TMP): the ball mill product is depicted in blue (lower); RAM product in red (upper). The labels denote the C-N and C-I carbons of TMP and p-DITFB, respectively. The asterisks denote spinning sidebands. ....                                   | S7  |
| <b>Figure S3.</b> Diffractogram for the RAM product, and calculated diffractogram for cocrystal <b>1a(ii)</b> , 4(p-DITFB)·1.5(TMP). ....                                                                                                                                                                                                          | S7  |
| <b>Figure S4.</b> <sup>13</sup> C solid-state NMR spectra of XB acceptor TMP in black (lower) and cocrystal <b>1a(ii)</b> , 4(p-DITFB)·1.5(TMP), prepared by RAM in red (upper). The labels denote the C-N and C-I carbons of TMP and p-DITFB, respectively. The asterisks denote spinning sidebands. ....                                         | S8  |
| <b>Figure S5.</b> Diffractograms for ball mill and RAM products, and calculated powder X-ray diffraction pattern for cocrystal <b>2a</b> , (sym-TFTIB)·(TMP). ....                                                                                                                                                                                 | S9  |
| <b>Figure S6.</b> <sup>13</sup> C solid-state NMR spectra of XB acceptor TMP in black (lower) and cocrystal <b>2a</b> , (sym-TFTIB)·(TMP), prepared by ball milling in blue (middle), and by RAM in red (upper). The labels denote the C-N carbons of TMP, and C-I and C-F carbons of sym-TFTIB. The asterisks denote spinning sidebands. ....     | S9  |
| <b>Figure S7.</b> Diffractograms for ball mill and RAM products, and calculated powder X-ray diffraction pattern for cocrystal <b>1b</b> , (p-DITFB)·2(DMAP). ....                                                                                                                                                                                 | S10 |
| <b>Figure S8.</b> <sup>13</sup> C solid-state NMR spectra of XB acceptor DMAP in black (lower) and cocrystal <b>1b</b> , (p-DITFB)·2(DMAP) prepared by ball milling in blue (middle), and by RAM in red (upper). The labels denote the C-N and C-I carbons of DMAP and p-DITFB, respectively. The asterisks denote spinning sidebands. ....        | S11 |
| <b>Figure S9.</b> Diffractograms for ball mill and RAM products, and calculated powder X-ray diffraction pattern for cocrystal <b>2b</b> , (sym-TFTIB)·3(DMAP). ....                                                                                                                                                                               | S12 |
| <b>Figure S10.</b> <sup>13</sup> C solid-state NMR spectra of XB acceptor DMAP in black (lower) and cocrystal <b>2b</b> , (sym-TFTIB)·3(DMAP) prepared by ball milling in blue (middle), and by RAM in red (upper). The labels denote the C-N carbons of DMAP, and C-I and C-F carbons of sym-TFTIB. The asterisks denote spinning sidebands. .... | S12 |
| <b>Figure S11.</b> Diffractograms of ball mill and RAM products, and calculated powder X-ray diffraction pattern for cocrystal <b>1c</b> , 2(p-DITFB)·(o-Phe). ....                                                                                                                                                                                | S13 |
| <b>Figure S12.</b> <sup>13</sup> C solid-state NMR spectra of XB acceptor o-Phe in black (lower) and cocrystal <b>1c</b> , 2(p-DITFB)·(o-Phe) prepared by ball milling in blue (middle), and by RAM in red (upper). The labels denote the C-N and C-I carbons of o-Phe and p-DITFB, respectively. The asterisks denote spinning sidebands. ....    | S14 |
| <b>Figure S15.</b> Diffractograms of ball mill and RAM products, and calculated powder X-ray diffraction pattern for cocrystal <b>1d</b> , (p-DITFB)·(PheDON). ....                                                                                                                                                                                | S16 |

|                                                                                                                                                                                                                                                                                                                                                       |     |
|-------------------------------------------------------------------------------------------------------------------------------------------------------------------------------------------------------------------------------------------------------------------------------------------------------------------------------------------------------|-----|
| <b>Figure S16.</b> $^{13}\text{C}$ solid-state NMR spectra of XB acceptor o-Phe in black (lower) and cocrystal <b>1d</b> , (p-DITFB)(PheDON) prepared by ball milling in blue (middle), and by RAM in red (upper). The labels denote the C-N and C-I carbons of PheDON and p-DITFB, respectively. The asterisks denote spinning sidebands. ....       | S17 |
| <b>Figure S17.</b> Diffractograms of ball mill and RAM products, and calculated powder X-ray diffraction pattern for cocrystal <b>2d</b> , (sym-TFTIB)(PheDON). ....                                                                                                                                                                                  | S18 |
| <b>Figure S18.</b> $^{13}\text{C}$ solid-state NMR spectra of XB acceptor o-Phe in black (lower) and cocrystal <b>2d</b> , (sym-TFTIB)(PheDON) prepared by ball milling in blue (middle), and by RAM in red (upper). The labels denote the C-N carbons of PheDON, and C-I and C-F carbons of sym-TFTIB. The asterisks denote spinning sidebands. .... | S18 |
| <b>Figure S19.</b> Diffractograms of ball mill and RAM products and calculated powder X-ray diffraction pattern for cocrystal <b>1e</b> , (p-DITFB)(DIZFON). ....                                                                                                                                                                                     | S19 |
| <b>Figure S20.</b> $^{13}\text{C}$ solid-state NMR spectra of XB acceptor o-Phe in black (lower) and cocrystal <b>1e</b> , (p-DITFB)(DIZFON) prepared by ball milling in blue (middle), and by RAM in red (upper). The labels denote the C-N and C-I carbons of DIZFON and p-DITFB, respectively. The asterisks denote spinning sidebands. ....       | S20 |
| <b>Figure S21.</b> Diffractograms for ball mill and RAM products, and calculated powder X-ray diffraction pattern for cocrystal <b>2e</b> , (sym-TFTIB)(DIZFON). ....                                                                                                                                                                                 | S21 |
| <b>Figure S22.</b> $^{13}\text{C}$ solid-state NMR spectra of XB acceptor DIZFON in black (lower) and cocrystal <b>2e</b> , (sym-TFTIB)(DIZFON) prepared by ball milling in blue (middle), and by RAM in red (upper). The labels denote the C-N carbons of, and C-I carbons of sym-TFTIB. The asterisks denote spinning sidebands. ....               | S21 |
| <b>Table S1.</b> $^{13}\text{C}[^1\text{H}]$ CPMAS solid-state NMR experimental conditions. ....                                                                                                                                                                                                                                                      | S22 |

### 1: **1a(i), (p-DITFB)·2(TMP)**<sup>1</sup>:

#### 1-1: RAM mechanochemistry synthesis

241 mg (0.5 mmol) 1,4-diiodotetrafluorobenzene (*p*-DITFB) as halogen bond donor, 82 mg (0.5 mmol) 2,3,5,6-tetramethylpyrazine (TMP) as an acceptor, and 260  $\mu$ L chloroform were added to a 1-dram glass vial and securely mounted within a lab-built sample holder and positioned on the PharmaRAM 1 resonant acoustic mixer. The sample was oscillated for 50 minutes at an acceleration of 80g.

#### 1.2: Ball milling preparation

The halogen bond donor, *p*-DITFB (241 mg, 0.5 mmol), and the halogen bond acceptor, TMP (82 mg, 0.5 mmol), were combined in a 10 mL stainless steel milling jar, with 50  $\mu$ L of chloroform as a liquid additive. Subsequently, ball milling was conducted using a Retsch MM 400 ball mill at a frequency of 30 Hz for 45 minutes at room temperature. The milling process employed two stainless steel grinding balls with a diameter of 5 mm.

#### 1.3: PXRD results

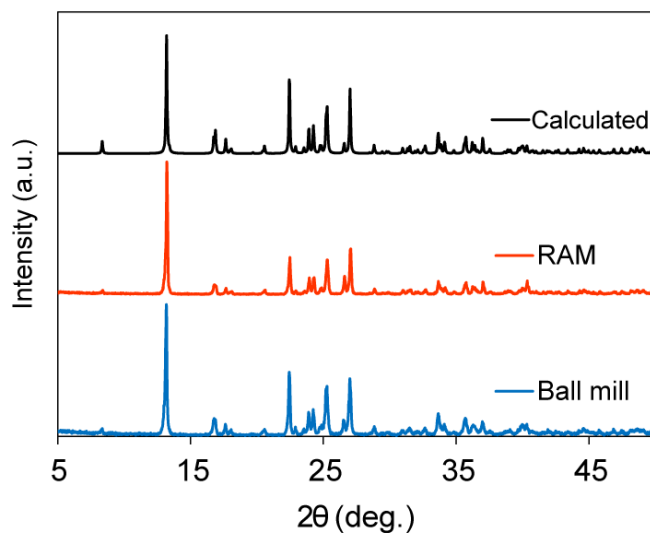

**Figure S1.** Experimental diffractograms for ball milled and RAM products, and calculated diffractogram for cocystal **1a(i)**, (*p*-DITFB)·2(TMP).

### 1-3: $^{13}\text{C}$ CP/MAS SSNMR results

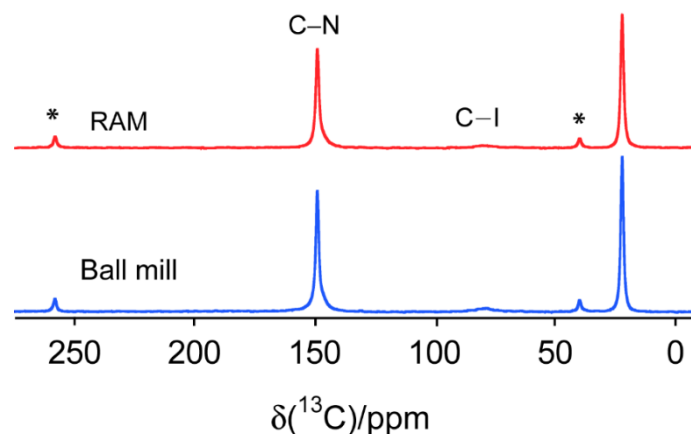

**Figure S2.**  $^{13}\text{C}$  solid-state NMR spectra of cocrystal **1a(i)**, (*p*-DITFB).2(TMP): the ball mill product is depicted in blue (lower); RAM product in red (upper). The labels denote the C-N and C-I carbons of TMP and *p*-DITFB, respectively. The asterisks denote spinning sidebands.

### 2: **1a(ii)**, 4(*p*-DITFB)-1.5(TMP)<sup>2</sup>

#### 2.1: RAM mechanochemistry synthesis

402 mg (1 mmol) 1,4-diiodotetrafluorobenzene (*p*-DITFB) as halogen bond donor and 68 mg (0.5 mmol) 2,3,5,6-tetramethylpyrazine (TMP) as an acceptor were added to a 1-dram glass vial and securely mounted within a lab-built sample holder and positioned on the PharmaRAM 1 resonant acoustic mixer. The sample was oscillated for 45 minutes at an acceleration of 80g.

#### 2.2: PXRD results

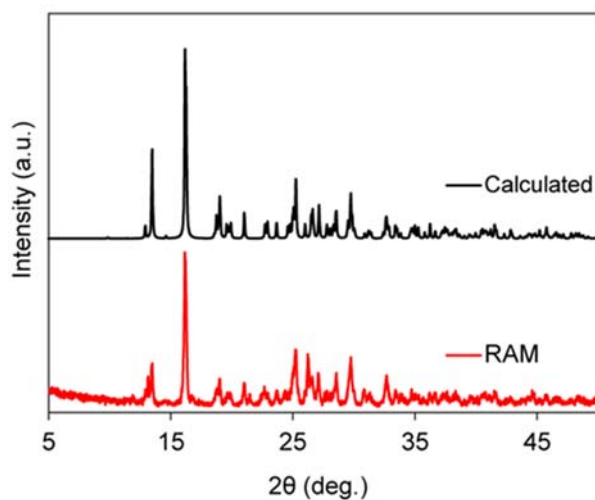

**Figure S3.** Diffractogram for the RAM product, and calculated diffractogram for cocrystal **1a(ii)**, 4(*p*-DITFB)-1.5(TMP).

### 2.3: $^{13}\text{C}$ CP/MAS SSNMR results

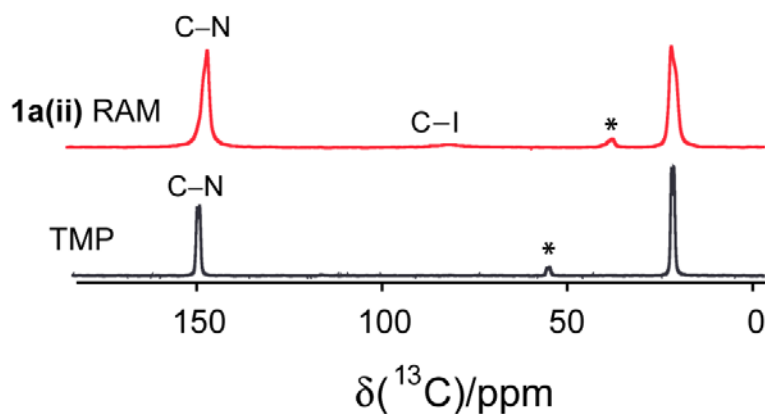

**Figure S4.**  $^{13}\text{C}$  solid-state NMR spectra of XB acceptor TMP in black (lower) and cocrystal **1a(ii)**, 4(*p*-DITFB)·1.5(TMP), prepared by RAM in red (upper). The labels denote the C-N and C-I carbons of TMP and *p*-DITFB, respectively. The asterisks denote spinning sidebands.

### 3: **2a**, (*sym*-TFTIB)·(TMP)<sup>3</sup>

#### 3.1: RAM mechanochemistry synthesis

357 mg (0.7 mmol) 1,3,5-trifluoro-2,4,6-triodobenzene (*sym*-FTIB) as halogen bond donor, 95 mg (0.7 mmol) 2,3,5,6-tetramethylpyrazine (TMP) as an acceptor, and 45  $\mu\text{L}$  THF were added to a 1-dram glass vial and securely mounted within a lab-built sample holder and positioned on the PharmaRAM 1 resonant acoustic mixer. The sample was oscillated for 50 minutes at an acceleration of 80g.

#### 3.2: Ball milling preparation

The halogen bond donor, *sym*-TFTIB (357 mg, 0.7 mmol), and the halogen bond acceptor, TMP (95 mg, 0.7 mmol), were combined in a 10 mL stainless steel milling jar, supplemented with 23  $\mu\text{L}$  of THF as a liquid additive. Subsequently, ball milling was conducted using a Retsch MM 400 ball mill at a frequency of 30 Hz for 40 minutes at room temperature. The milling process employed two stainless steel grinding balls with a diameter of 5 mm.

### 3.3: PXRD results

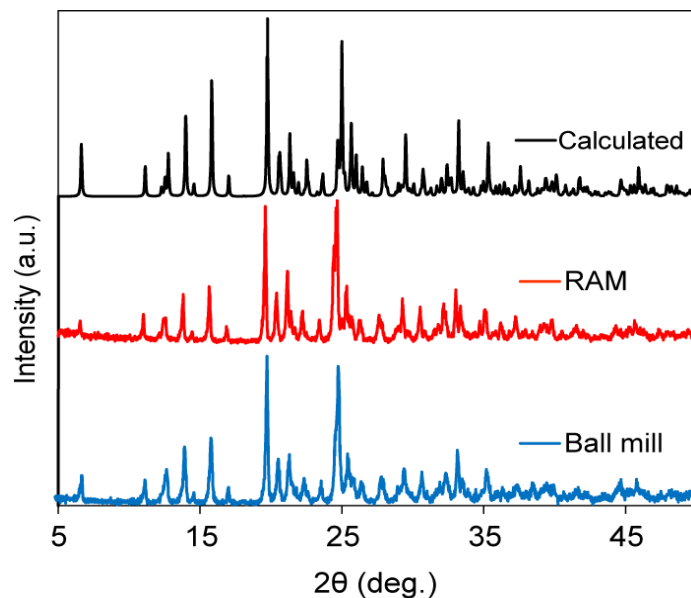

**Figure S5.** Diffractograms for ball mill and RAM products, and calculated powder X-ray diffraction pattern for cocrystal **2a**, (*sym*-TFTIB)(TMP).

### 3.4: $^{13}\text{C}$ CP/MAS SSNMR results

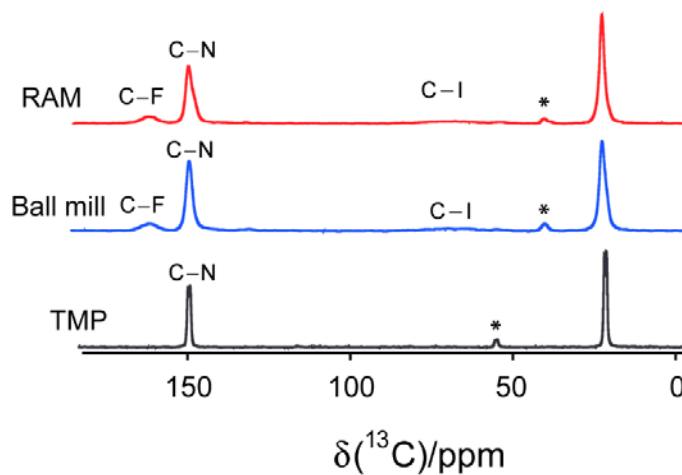

**Figure S6.**  $^{13}\text{C}$  solid-state NMR spectra of XB acceptor TMP in black (lower) and cocrystal **2a**, (*sym*-TFTIB)(TMP), prepared by ball milling in blue (middle), and by RAM in red (upper). The labels denote the C-N carbons of TMP, and C-I and C-F carbons of *sym*-TFTIB. The asterisks denote spinning sidebands.

#### 4: **1b**, (*p*-DITFB)<sub>2</sub>(DMAP)<sup>4</sup>

##### 4.1: RAM mechanochemistry synthesis

321 mg (0.8 mmol) 1,4-diiodotetrafluorobenzene (*p*-DITFB) as halogen bond donor and 196 mg (1.6 mmol) 4-dimethylaminopyridine (DMAP) as an acceptor were added to a 1-dram glass vial and securely mounted within a lab-built sample holder and positioned on the PharmaRAM 1 resonant acoustic mixer. The sample was oscillated for 45 minutes at an acceleration of 80g.

##### 4.2: Ball milling preparation

The halogen bond donor, *p*-DITFB (321 mg, 0.8 mmol), and the halogen bond acceptor, DMAP (196 mg, 1.6 mmol), were combined in a 10 mL stainless steel milling jar. Subsequently, ball milling was conducted using a Retsch MM 400 ball mill at a frequency of 30 Hz for 30 minutes at room temperature. The milling process employed two stainless steel grinding balls with a diameter of 5 mm.

##### 4.3: PXRD results

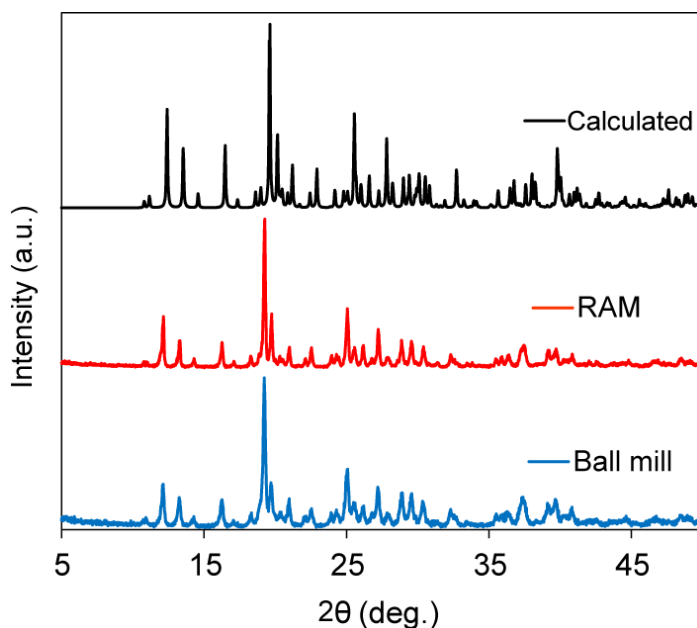

**Figure S7.** Diffractograms for ball mill and RAM products, and calculated powder X-ray diffraction pattern for cocrystal **1b**, (*p*-DITFB)<sub>2</sub>(DMAP).

#### 4.4: $^{13}\text{C}$ CP/MAS SSNMR results

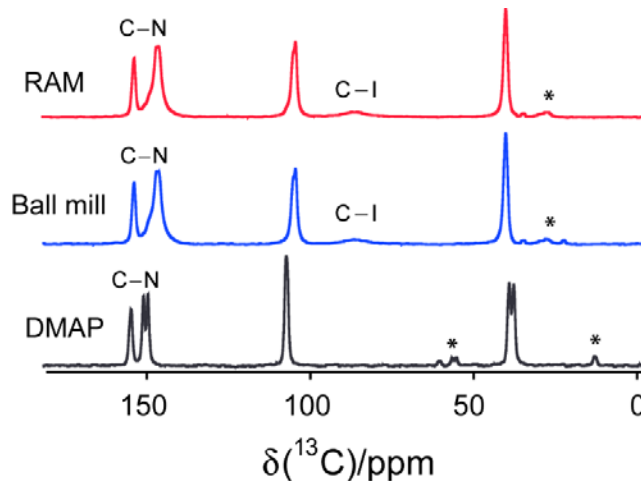

**Figure S8.**  $^{13}\text{C}$  solid-state NMR spectra of XB acceptor DMAP in black (lower) and cocrystal **1b**, (*p*-DITFB) $_2$ (DMAP) prepared by ball milling in blue (middle), and by RAM in red (upper). The labels denote the C-N and C-I carbons of DMAP and *p*-DITFB, respectively. The asterisks denote spinning sidebands.

### 5: **2b**, (*sym*-TFTIB) $_3$ (DMAP) $_5$

#### 5.1: RAM mechanochemistry synthesis

255 mg (0.5 mmol) 1,3,5-trifluoro-2,4,6-triiodobenzene (*sym*-TFTIB) as halogen bond donor and 183 mg (1.5 mmol) 4-dimethylaminopyridine (DMAP) as an acceptor were added to a 1-dram glass vial and securely mounted within a lab-built sample holder and positioned on the PharmaRAM 1 resonant acoustic mixer. The sample was oscillated for 50 minutes at an acceleration of 80g.

#### 5.2: Ball milling preparation

The halogen bond donor, *sym*-TFTIB (255 mg, 0.5 mmol), and the halogen bond acceptor, DMAP (183 mg, 1.5 mmol), were added to a 10 mL stainless steel milling jar. Subsequently, ball milling was conducted using a Retsch MM 400 ball mill at a frequency of 30 Hz for 45 minutes at room temperature. The milling process employed two stainless steel grinding balls with a diameter of 5 mm.

### 5.3: PXRD results

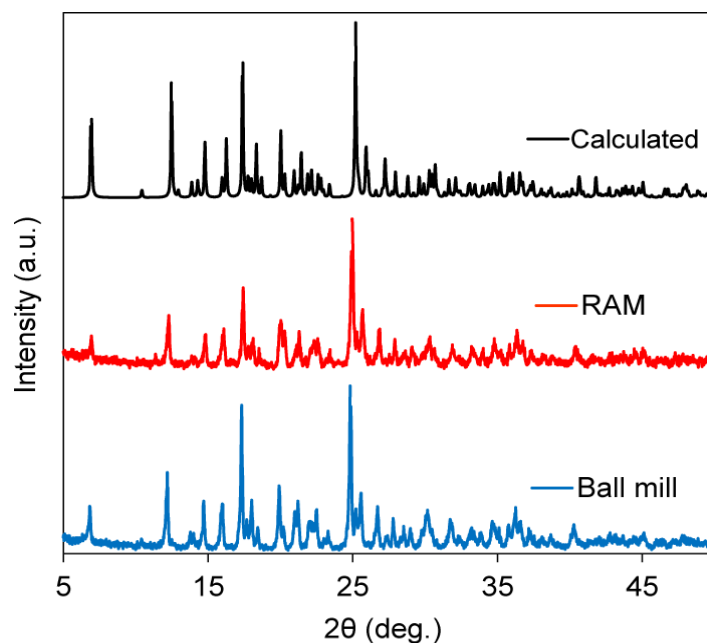

**Figure S9.** Diffractograms for ball mill and RAM products, and calculated powder X-ray diffraction pattern for cocrystal **2b**, (*sym*-TFTIB) $\cdot$ 3(DMAP).

### 5.4: $^{13}\text{C}$ CP/MAS SSNMR results

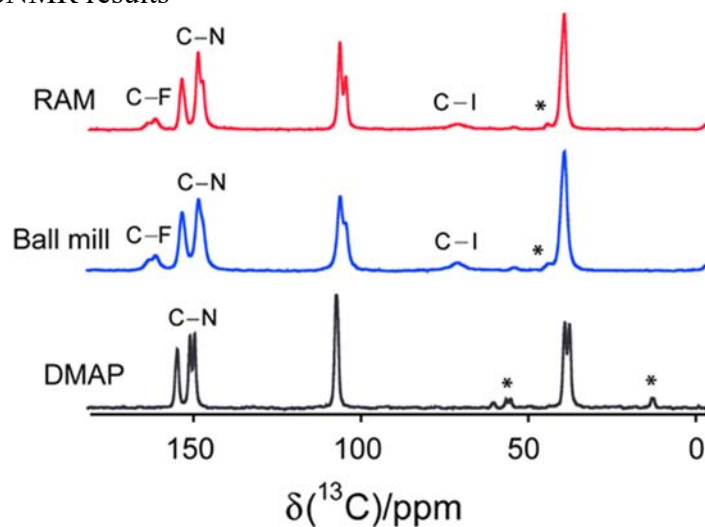

**Figure S10.**  $^{13}\text{C}$  solid-state NMR spectra of XB acceptor DMAP in black (lower) and cocrystal **2b**, (*sym*-TFTIB) $\cdot$ 3(DMAP) prepared by ball milling in blue (middle), and by RAM in red (upper). The labels denote the C-N carbons of DMAP, and C-I and C-F carbons of *sym*-TFTIB. The asterisks denote spinning sidebands.

## 6: **1c**, 2(*p*-DITFB).(o-Phe)<sup>1</sup>

### 6.1: RAM mechanochemistry synthesis

321 mg (0.8 mmol) 1,4-diiodotetrafluorobenzene (*p*-DITFB) as halogen bond donor, 196 mg (1.6 mmol) 1,10-phenanthroline (o-Ph) as acceptor, and 35  $\mu$ L chloroform were added were added to a 1-dram glass vial and securely mounted within a lab-built sample holder and positioned on the PharmaRAM 1 resonant acoustic mixer. The sample was oscillated for 50 minutes at an acceleration of 80g.

### 6.2: Ball milling preparation

The halogen bond donor, *p*-DITFB (241 mg, 0.6 mmol), and the halogen bond acceptor, o-Ph (108 mg, 0.6 mmol), were combined in a 10 mL stainless steel milling jar, supplemented with 18  $\mu$ L of chloroform as a liquid additive. Subsequently, ball milling was conducted using a Retsch MM 400 ball mill at a frequency of 30 Hz for 45 minutes at room temperature. The milling process employed two stainless steel grinding balls with a diameter of 5 mm.

### 6.3: PXRD results

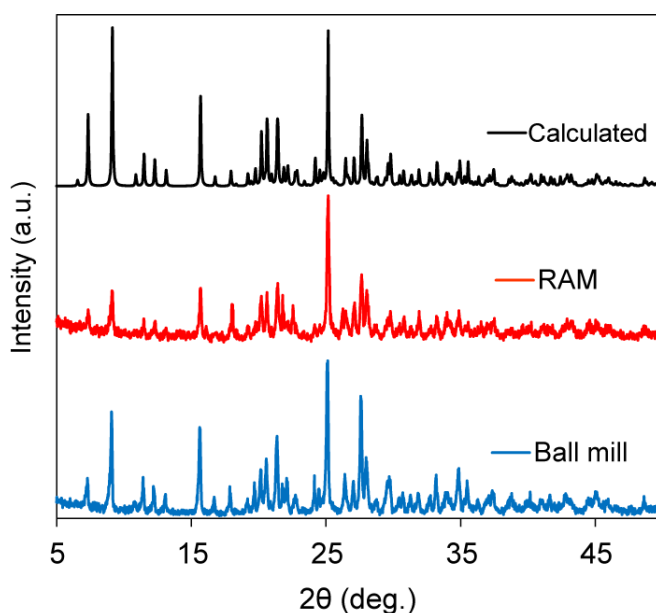

**Figure S11.** Diffractograms of ball mill and RAM products, and calculated powder X-ray diffraction pattern for cocrystal **1c**, 2(*p*-DITFB).(o-Phe).

#### 6.4: $^{13}\text{C}$ CP/MAS SSNMR results

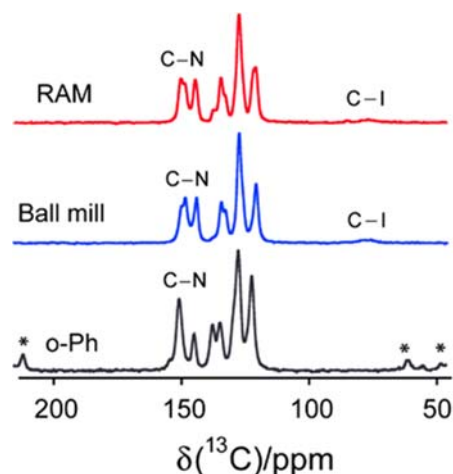

**Figure S12.**  $^{13}\text{C}$  solid-state NMR spectra of XB acceptor o-Ph in black (lower) and cocrystal **1c**,  $2(p\text{-DITFB})\cdot(\text{o-Ph})$  prepared by ball milling in blue (middle), and by RAM in red (upper). The labels denote the C-N and C-I carbons of o-Ph and *p*-DITFB, respectively. The asterisks denote spinning sidebands.

#### 7: **2c**, (*sym*-TFTIB)·(*o*-Ph)<sup>3</sup>

##### 7.1: RAM mechanochemistry synthesis

255 mg (0.5 mmol) 1,3,5-trifluoro-2,4,6-triiodobenzene (*sym*-TFTIB) as halogen bond donor, 90 mg (0.5 mmol) 1,10-phenanthroline (*o*-Ph) as acceptor, and 35  $\mu\text{L}$  THF were added to a 1-dram glass vial and securely mounted within a lab-built sample holder and positioned on the PharmaRAM 1 resonant acoustic mixer. The sample was oscillated for 50 minutes at an acceleration of 80g.

##### 7.2: Ball milling preparation

The halogen bond donor, *sym*-TFTIB (255 mg, 0.5 mmol), and the halogen bond acceptor, *o*-Ph (90 mg, 0.5 mmol), were combined in a 10 mL stainless steel milling jar, supplemented with 18  $\mu\text{L}$  of chloroform as a liquid additive. Subsequently, ball milling was conducted using a Retsch MM 400 ball mill at a frequency of 30 Hz for 45 minutes at room temperature. The milling process employed two stainless steel grinding balls with a diameter of 5 mm.

### 7.3: PXRD results

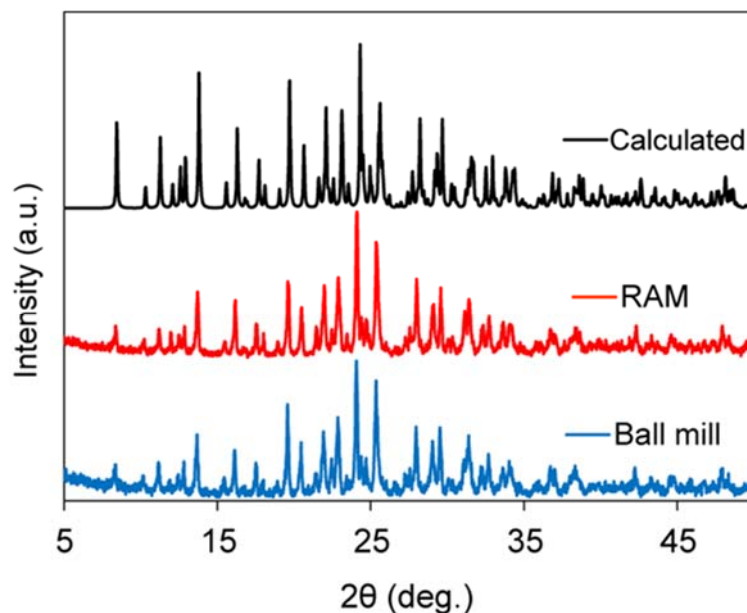

**Figure S13.** Diffractograms of ball mill and RAM products, and calculated powder X-ray diffraction pattern for cocrystal **2c**, (*sym*-TFTIB)·(*o*-Phe).

### 7.4: $^{13}\text{C}$ CP/MAS SSNMR results

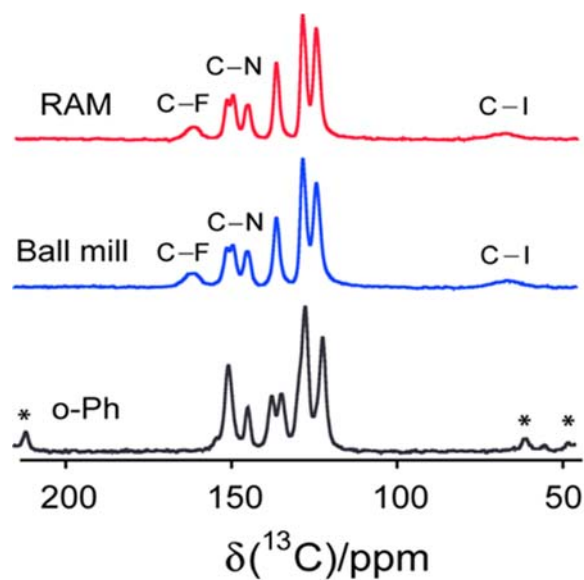

**Figure S14.**  $^{13}\text{C}$  solid-state NMR spectra of XB acceptor *o*-Phe in black (lower) and cocrystal **2c**, (*sym*-TFTIB)·(*o*-Phe) prepared by ball milling in blue (middle), and by RAM in red (upper). The labels denote the C-N carbons of *o*-Phe, and C-I and C-F carbons of *sym*-TFTIB. The asterisks denote spinning sidebands.

## 8: 1d, (*p*-DITFB)(PheDON)<sup>6</sup>

### 8.1: RAM mechanochemistry synthesis

205 mg (0.5 mmol) 1,4-diiodotetrafluorobenzene (*p*-DITFB) as halogen bond donor, 105 mg (0.5 mmol) 1,10-phenanthroline-5,6-dione (PheDON) as acceptor, and 155  $\mu$ L chloroform were added to a 1-dram glass vial and securely mounted within a lab-built sample holder and positioned on the PharmaRAM 1 resonant acoustic mixer. The sample was oscillated for 50 minutes at an acceleration of 80g.

### 8.2: Ball milling preparation

The halogen bond donor, *p*-DITFB (205 mg, 0.5 mmol), and the halogen bond acceptor, PheDON (105 mg, 0.5 mmol), were combined in a 10 mL stainless steel milling jar, supplemented with 31  $\mu$ L of chloroform as a liquid additive. Subsequently, ball milling was conducted using a Retsch MM 400 ball mill at a frequency of 30 Hz for 30 minutes at room temperature. The milling process employed two stainless steel grinding balls with a diameter of 5 mm.

### 8.3: PXRD results

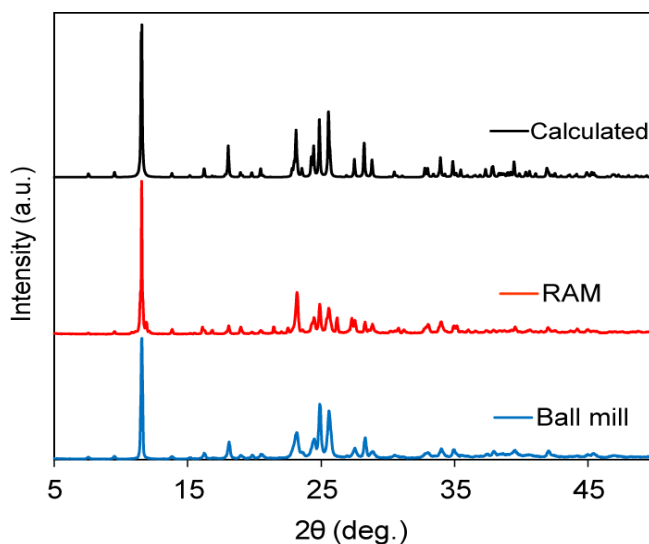

**Figure S15.** Diffractograms of ball mill and RAM products, and calculated powder X-ray diffraction pattern for cocrystal **1d**, (*p*-DITFB)(PheDON).

#### 8.4: $^{13}\text{C}$ CP/MAS SSNMR results

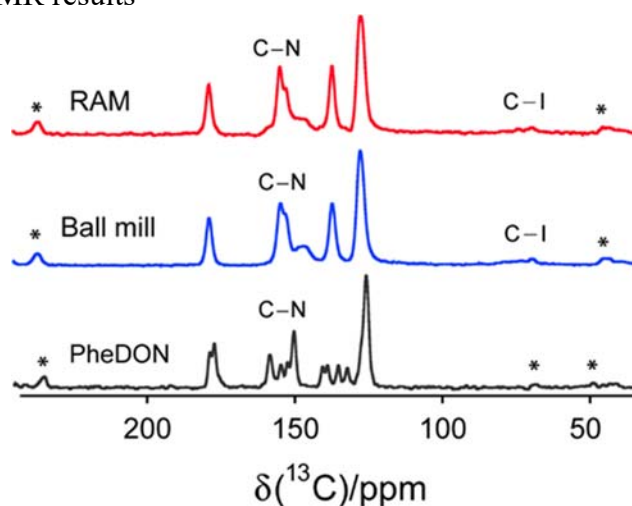

**Figure S16.**  $^{13}\text{C}$  solid-state NMR spectra of XB acceptor o-Phe in black (lower) and cocrystal **1d**, (*p*-DITFB)(PheDON) prepared by ball milling in blue (middle), and by RAM in red (upper). The labels denote the C-N and C-I carbons of PheDON and *p*-DITFB, respectively. The asterisks denote spinning sidebands.

### 9: **2d**, (*sym*-TFTIB)(PheDON)

#### 9.1: RAM mechanochemistry synthesis

205 mg (0.5 mmol) 1,3,5-trifluoro-2,4,6-triiodobenzene (*sym*-TFTIB) as halogen bond donor, 105 mg (0.5 mmol) 1,10-phenanthroline-5,6-dione (PheDON) as acceptor, and 250  $\mu\text{L}$  chloroform were added to a 1-dram glass vial and securely mounted within a lab-built sample holder and positioned on the PharmaRAM 1 resonant acoustic mixer. The sample was oscillated for 50 minutes at an acceleration of 80g.

#### 9.2: Ball milling preparation

The halogen bond donor, *sym*-TFTIB (205 mg, 0.5 mmol), and the halogen bond acceptor, PheDON (105 mg, 0.5 mmol), were combined in a 10 mL stainless steel milling jar, supplemented with 31  $\mu\text{L}$  of chloroform as a liquid additive. Subsequently, ball milling was conducted using a Retsch MM 400 ball mill at a frequency of 30 Hz for 45 minutes at room temperature. The milling process employed two stainless steel grinding balls with a diameter of 5 mm.

#### 9.3: Crystal preparation by slow evaporation:

The halogen bond donor, *sym*-TFTIB (76 mg, 0.15 mmol), was dissolved in 2 mL of chloroform. The halogen bond acceptor, PheDON (32 mg, 0.15 mmol), was dissolved in 2 mL of chloroform. The donor solution was added dropwise to the halogen bond acceptor solution. The solvent was allowed to gradually evaporate at room temperature, resulting in the formation of orange cocrystals of **2d**. The vial was tightly sealed as soon as single cocrystals were observed by eye.

#### 9.4: PXRD results

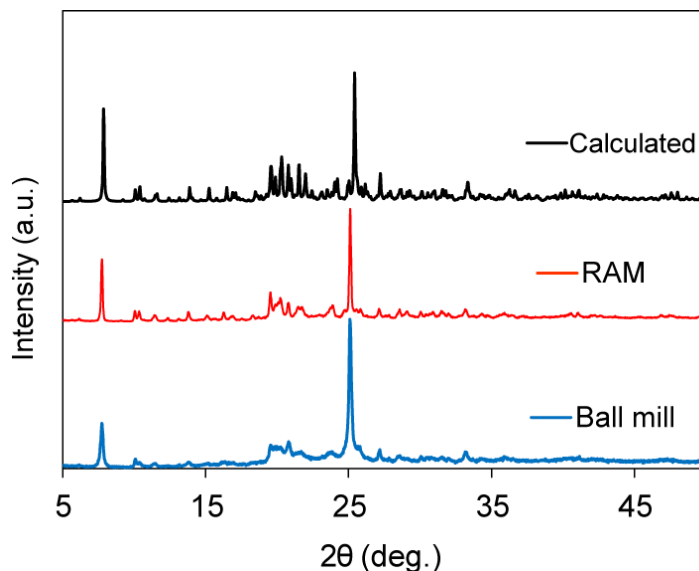

**Figure S17.** Diffractograms of ball mill and RAM products, and calculated powder X-ray diffraction pattern for cocrystal **2d**, (*sym*-TFTIB)(PheDON).

#### 9.5: $^{13}\text{C}$ CP/MAS SSNMR results

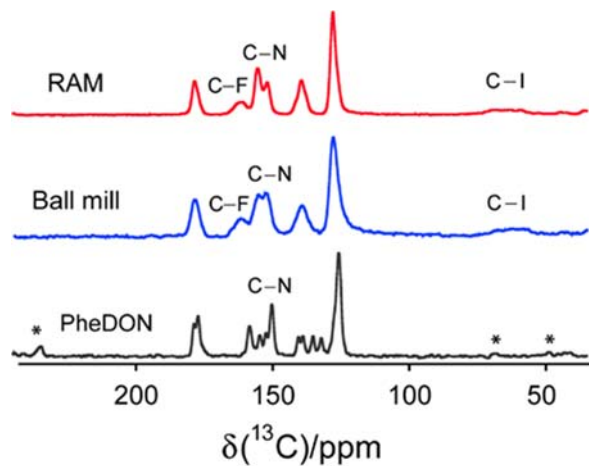

**Figure S18.**  $^{13}\text{C}$  solid-state NMR spectra of XB acceptor o-Phe in black (lower) and cocrystal **2d**, (*sym*-TFTIB)(PheDON) prepared by ball milling in blue (middle), and by RAM in red (upper). The labels denote the C-N carbons of PheDON, and C-I and C-F carbons of *sym*-TFTIB. The asterisks denote spinning sidebands.

## 10: 1e, (*p*-DITFB)·(DIZFON)<sup>6</sup>

### 10.1: RAM mechanochemistry synthesis:

205 mg (0.5 mmol) 1,4-diiodotetrafluorobenzene (*p*-DITFB) as halogen bond donor, 91 mg (0.5 mmol) 4,5-diazafluoren-9-one (DIZFON) as acceptor, and 150  $\mu$ L THF were added to a 1-dram glass vial and securely mounted within a lab-built sample holder and positioned on the PharmaRAM 1 resonant acoustic mixer. The sample was oscillated for 50 minutes at an acceleration of 80g.

### 10.2: Ball milling preparation

The halogen bond donor, *p*-DITFB (205 mg, 0.5 mmol), and the halogen bond acceptor, DIZFON (91 mg, 0.5 mmol), were combined in a 10 mL stainless steel milling jar, supplemented with 30  $\mu$ L of chloroform as a liquid additive. Subsequently, ball milling was conducted using a Retsch MM 400 ball mill at a frequency of 30 Hz for 30 minutes at room temperature. The milling process employed two stainless steel grinding balls with a diameter of 5 mm.

### 10.3: PXRD results

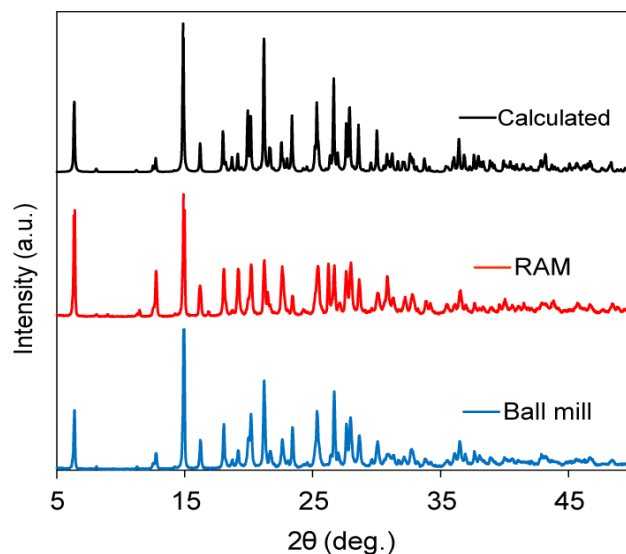

**Figure S19.** Diffractograms of ball mill and RAM products and calculated powder X-ray diffraction pattern for cocrystal **1e**, (*p*-DITFB)·(DIZFON).

#### 10.4: $^{13}\text{C}$ CP/MAS SSNMR results

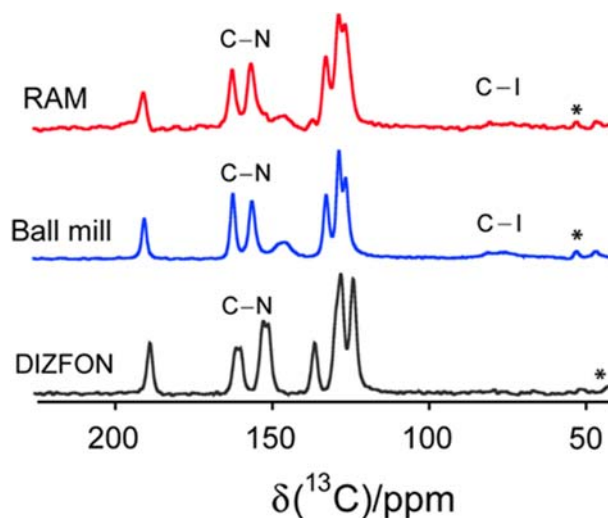

**Figure S20.**  $^{13}\text{C}$  solid-state NMR spectra of XB acceptor o-Phe in black (lower) and cocrystal **1e**, (*p*-DITFB):(DIZFON) prepared by ball milling in blue (middle), and by RAM in red (upper). The labels denote the C-N and C-I carbons of DIZFON and *p*-DITFB, respectively. The asterisks denote spinning sidebands.

#### 11: **2e**, (*sym*-TFTIB):(DIZFON)

##### 11.1: RAM mechanochemistry synthesis

255 mg (0.5 mmol) 1,3,5-trifluoro-2,4,6-triiodobenzene (*sym*-TFTIB) as halogen bond donor, 94 mg (0.5 mmol) 4,5-diazafluoren-9-one (DIZFON) as acceptor, and 223  $\mu\text{L}$  THF were added to a 1-dram glass vial and securely mounted within a lab-built sample holder and positioned on the PharmaRAM 1 resonant acoustic mixer. The sample was oscillated for 50 minutes at an acceleration of 80g.

##### 11.2: Ball milling preparation

The halogen bond donor, *sym*-TFTIB (255 mg, 0.5 mmol), and the halogen bond acceptor, DIZFON (94 mg, 0.5 mmol), were combined in a 10 mL stainless steel milling jar, supplemented with 32  $\mu\text{L}$  of chloroform as a liquid additive. Subsequently, ball milling was conducted using a Retsch MM 400 ball mill at a frequency of 30 Hz for 45 minutes at room temperature. The milling process employed two stainless steel grinding balls with a diameter of 5 mm.

##### 11.3: Crystal preparation by slow evaporation

The halogen bond donor, *sym*-TFTIB (76 mg), was dissolved in 2 mL of chloroform. The halogen bond acceptor, DIZFON (27 mg), was dissolved in 2 mL of chloroform. The donor solution was added dropwise to the acceptor solution. The solvent was allowed to gradually evaporate at room temperature, resulting in the formation of yellow cocrystals of **2e**. The vial was tightly sealed as soon as single cocrystals were observed by eye.

#### 11.4: PXRD results

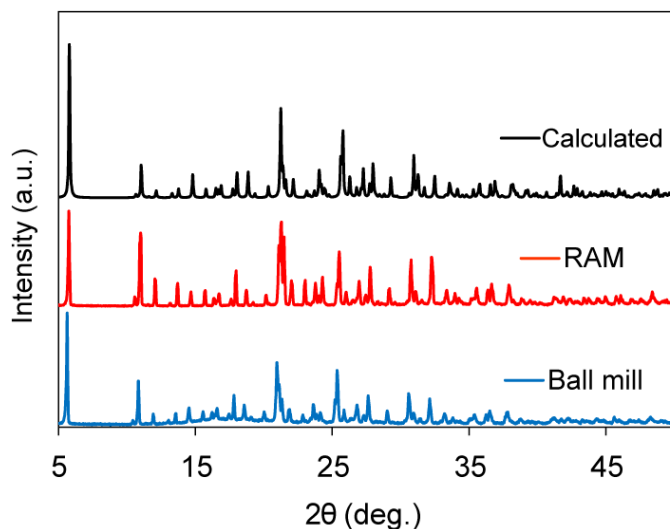

**Figure S21.** Diffractograms for ball mill and RAM products, and calculated powder X-ray diffraction pattern for cocrystal **2e**, (*sym*-TFTIB)·(DIZFON).

#### 11.5: $^{13}\text{C}$ CP/MAS SSNMR results

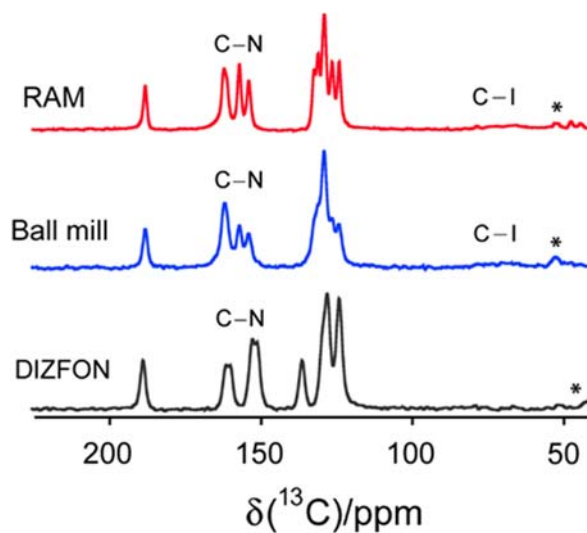

**Figure S22.**  $^{13}\text{C}$  solid-state NMR spectra of XB acceptor DIZFON in black (lower) and cocrystal **2e**, (*sym*-TFTIB)·(DIZFON) prepared by ball milling in blue (middle), and by RAM in red (upper). The labels denote the C-N carbons of, and C-I carbons of *sym*-TFTIB. The asterisks denote spinning sidebands.

**Table S1.**  $^{13}\text{C}[^1\text{H}]$  CPMAS solid-state NMR experimental conditions.

| compound      | number of scans | recycle delay / s | MAS frequency / kHz |
|---------------|-----------------|-------------------|---------------------|
| <b>a</b>      | 2048            | 2                 | 10                  |
| <b>1a(i)</b>  | 1024            | 30                | 11                  |
| <b>1a(ii)</b> | 1024            | 30                | 11                  |
| <b>2a</b>     | 1024            | 30                | 11                  |
| <b>b</b>      | 2048            | 30                | 10                  |
| <b>1b</b>     | 1024            | 30                | 12                  |
| <b>2b</b>     | 1024            | 40                | 11                  |
| <b>c</b>      | 1024            | 60                | 4.5                 |
| <b>1c</b>     | 1024            | 60                | 12                  |
| <b>2c</b>     | 1024            | 90                | 12                  |
| <b>d</b>      | 512             | 100               | 11                  |
| <b>1d</b>     | 2048            | 30                | 11                  |
| <b>2d</b>     | 2048            | 40                | 12                  |
| <b>e</b>      | 1024            | 120               | 11                  |
| <b>1e</b>     | 1024            | 120               | 11                  |
| <b>2e</b>     | 1024            | 80                | 11                  |

### Additional Details on Single-Crystal X-Ray Diffraction for **2d** and **2e**

Raw data collection and processing were executed utilizing the ApexIII software package developed by Bruker.<sup>7</sup> Initial unit cell parameters were deduced from 36 data frames obtained from specific  $\omega$  scans. Semi-empirical absorption corrections, based on equivalent reflections, were applied as part of the data processing.<sup>8</sup> The systematic absences observed in the diffraction dataset and the unit cell parameters were in line with the assigned space group.

Initial structural solutions were established employing ShelxT direct methods<sup>9</sup> and subsequently refined using full-matrix least-squares procedures based on  $F^2$  with the assistance of ShelXL and ShelXle software.<sup>10</sup> Hydrogen atom positions were determined based on geometric considerations and further refined using a riding model.

The structure of **2d** (which contains 8 sets of crystallographically unique molecule pairs stacked in layers) is noteworthy as the difference map shows the presence of whole molecule disorder among some of the layers over a mirror plane. Attempts were made to model this behaviour both from a twinning or supercell standpoint, and through modelling of the disorder directly. In the former case, use of RLatt, cell\_now, and other twin detection tools did not convincingly show the presence of any twinning. When disorder was modelled directly, the R value and general quality of the structure did not improve, the disorder fraction remained small, and it served only to muddy the interpretation of the structure. Thus the potential disorder was not included in the final model.

## References

- 1 J. L. Syssa-Magalé, K. Boubekeur and B. Schöllhorn, *J. Mol. Struct.*, 2005, **737**, 103–107.
- 2 P. M. J. Szell, S. A. Gabriel, E. Caron-Poulin, O. Jeannin, M. Fourmigué and D. L. Bryce, *Cryst. Growth Des.*, 2018, **18**, 6227–6238.
- 3 P. M. J. Szell, S. A. Gabriel, R. D. D. Gill, S. Y. H. Wan, B. Gabidullin and D. L. Bryce, *Acta Cryst. C*, 2017, **73**, 157–167.
- 4 R. Wang, D. Hartnick and U. Englert, *Z. Kristallogr.*, 2018, **233**, 733–744.
- 5 L. C. Roper, C. Präsang, V. N. Kozhevnikov, A. C. Whitwood, P. B. Karadakov and D. W. Bruce, *Cryst. Growth Des.*, 2010, **10**, 3710–3720.
- 6 B. Ji, W. Wang, D. Deng and Y. Zhang, *Cryst. Growth Des.*, 2011, **11**, 3622–3628.
- 7 Bruker, APEX3 Software Suite (version 218.7-2), Bruker AXS Inc. Madison Wisconsin USA, 2018.
- 8 R. H. Blessing, *Acta Cryst. A*, 1995, **51**, 33–38.
- 9 G. M. Sheldrick, *Acta Cryst. A*, 2008, **64**, 112–122.
- 10 C. B. Hübschle, G. M. Sheldrick and B. Dittrich, *J. Appl. Crystallogr.*, 2011, **44**, 1281–1284.
